# Supplementary material
Source: PubMed Central journal article supplement (PMC4289469)

# Supplementary Figure 1.

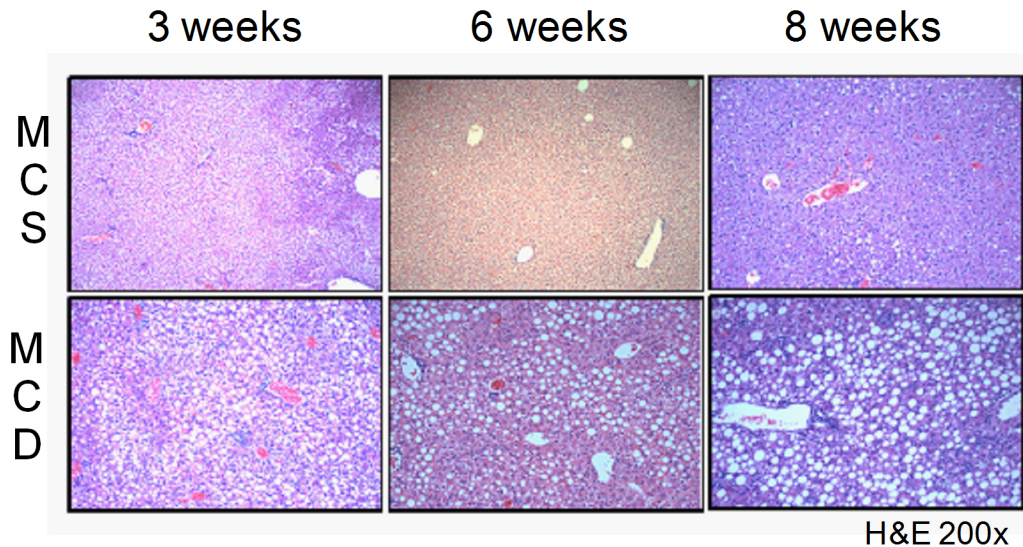

## Supplementary figure 2.

### A

|                                              |         |
|----------------------------------------------|---------|
| 3' guuugugguaacaguGUGAGGu 5' mmu-miR-122<br> |         |
| 925:5' ugucaggccugagccCACUCCa 3' Map3k3      |         |
| mirSVR score:                                | -0.0030 |
| PhastCons score:                             | 0.5644  |

### B

|                                               |         |
|-----------------------------------------------|---------|
| 3' guuUGUGGUAACAGUGU-GAGGu 5' mmu-miR-122<br> |         |
| 241:5' aucACAGCACAUUCACAGCUCCu 3' Hif1a       |         |
| mirSVR score:                                 | -0.7849 |
| PhastCons score:                              | 0.7267  |

### C

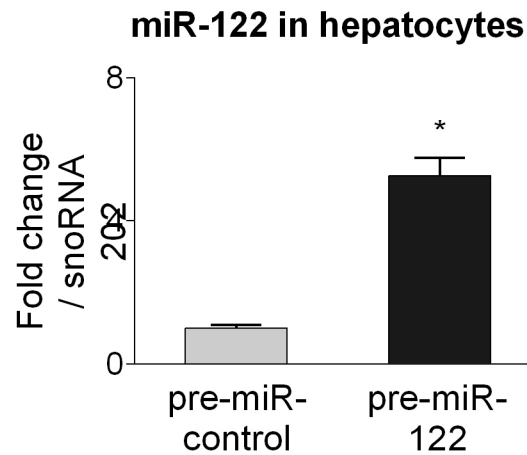

# Supplementary figure 3

## A

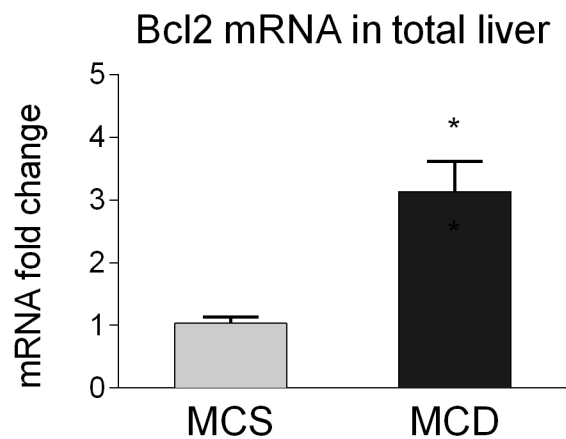

## B

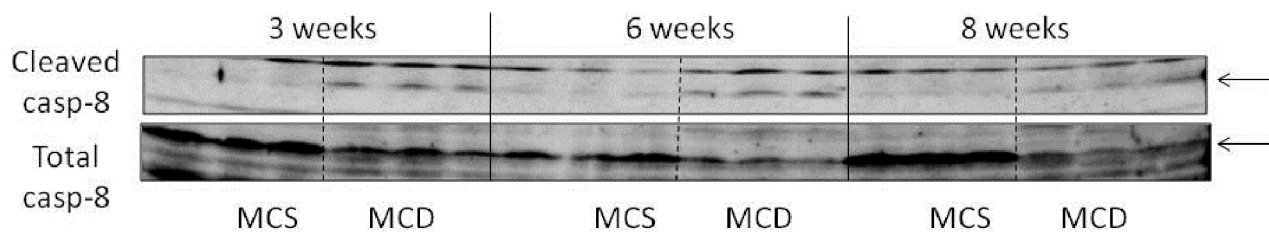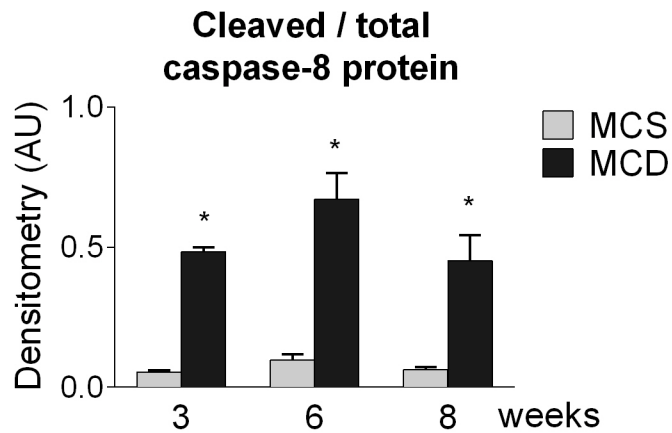

# Supplementary figure 4

## miR-122 in murine HSCs

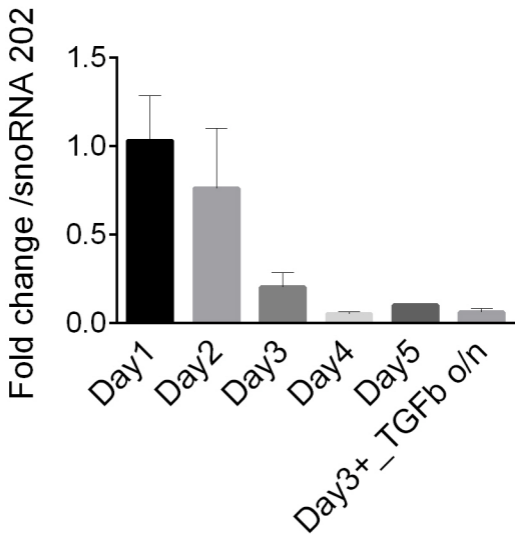

## Supplementary figure 5

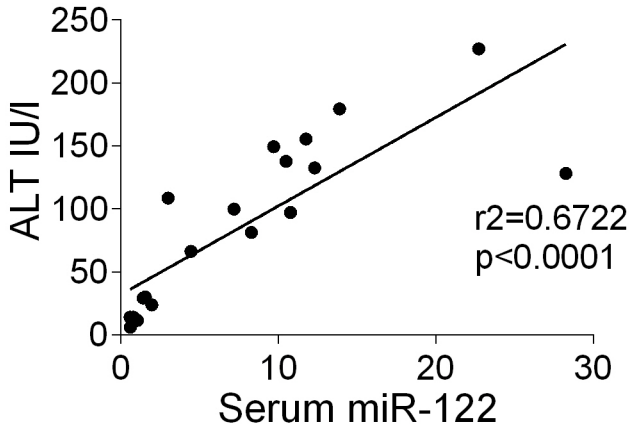

Supplementary figure 6

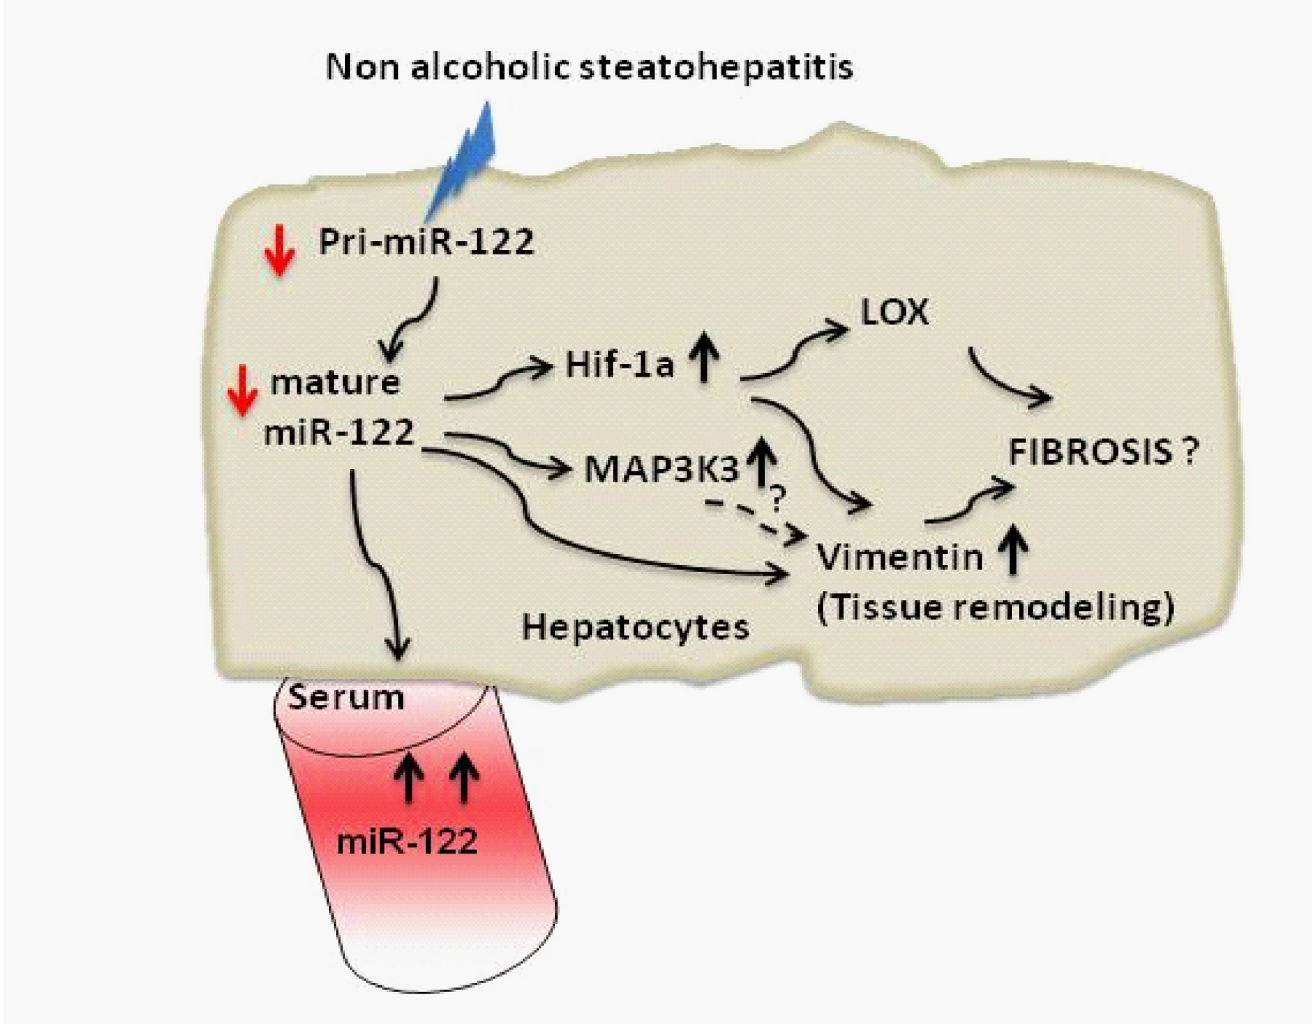

Supplement: NIHMS613239-supplement-Supp_FigureS1-S6.pdf [file NIHMS613239-supplement-Supp_FigureS1-S6.pdf]
